# Supplementary material
Source: publisher site journal article supplement (https://www.dovepress.com/article/319480)

# Supplementary Material

Supplement Figure 1. ROC analysis of the sum of diameters of all measurable tumor lesions, LDH, and NLR for responders versus non-responders to ICI treatment.

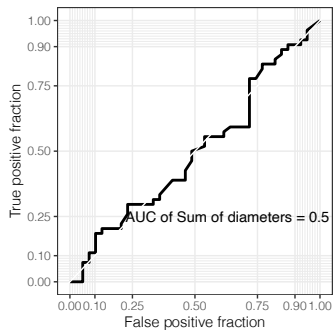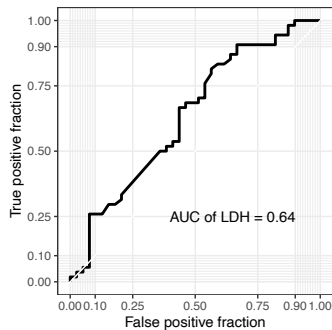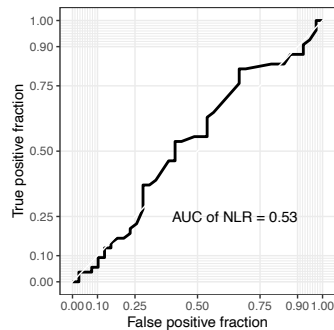

Supplement: Supplementary file 1 [file get_supplementary_file.php]
